# Supplementary material for: Chemical and Bioactive Features of Amaranthus caudatus L. Flowers and Optimized Ultrasound-Assisted Extraction of Betalains
Source: PubMed Central journal article supplement (PMC8067032; doi:10.3390/foods10040779), 2021-04-05
Supplement: foods-10-00779-s001.pdf [file foods-10-00779-s001.pdf]

## Supplementary Material

**Table S1.** Selected and coded values of the independent variables used in the five-level CCD design implemented to optimize the extraction process of betacyanins from *Amaranthus* using RSM.

| Coded values | Selected values |                      |
|--------------|-----------------|----------------------|
|              | Time (min)      | Ultrasonic power (W) |
| -1.189       | 1               | 5                    |
| -1           | 4.5             | 44.4                 |
| 0            | 23              | 252.5                |
| +1           | 41.5            | 460.6                |
| +1.189       | 45              | 500                  |

**Table S2.** Parametric coefficients and statistical information of the fitting procedure of the models. Parametric superscripted 1 and 2 stands for the variables time and ultrasonic power, respectively.

|                               |          | Extraction yield | Amaranthine    | Isoamaranthine   | Total betacyanins |
|-------------------------------|----------|------------------|----------------|------------------|-------------------|
| Intercept                     | $b_0$    | $1.73 \pm 0.02$  | $52.1 \pm 0.2$ | $18.05 \pm 0.09$ | $74.6 \pm 0.3$    |
| Linear effect                 | $b_1$    | $0.19 \pm 0.03$  | ns             | ns               | ns                |
|                               | $b_2$    | $0.24 \pm 0.03$  | ns             | ns               | ns                |
| Quadratic effect              | $b_{11}$ | ns               | ns             | ns               | ns                |
|                               | $b_{22}$ | ns               | ns             | ns               | ns                |
| Interactive effect            | $b_{12}$ | ns               | $-3.4 \pm 0.4$ | $-1.2 \pm 0.2$   | $-4.7 \pm 0.7$    |
| <b>Statistical data</b>       |          |                  |                |                  |                   |
| Model F-value                 |          | 47.58            | 20.95          | 14.19            | 17.46             |
| Lack of Fit                   |          | ns               | ns             | ns               | ns                |
| R <sup>2</sup>                |          | 0.8638           | 0.8178         | 0.7526           | 0.7891            |
| R <sup>2</sup> <sub>adj</sub> |          | 0.8457           | 0.7788         | 0.7000           | 0.7439            |
| Adequate Precision            |          | 21.60            | 17.32          | 15.41            | 15.63             |
| C.V. (%)                      |          | 5.52             | 1.63           | 2.06             | 1.74              |

R<sup>2</sup>: coefficient of determination; R<sup>2</sup><sub>adj</sub>: adjusted coefficient of determination; C.V.: coefficient of variation; ns: not significant.

**Table S3.** Optimal extraction conditions that maximize the response values.

|                            | Optimal UAE conditions |           | Response optimum                  |
|----------------------------|------------------------|-----------|-----------------------------------|
|                            | Time (min)             | Power (W) |                                   |
| For each response variable |                        |           |                                   |
| Extraction yield           | 38.5                   | 474.3     | $2.14 \pm 0.05$ % (w/w)           |
| Amaranthine                | 4.2                    | 443.0     | $55.2 \pm 0.6$ mg/g plat material |
| Isoamaranthine             | 6.49                   | 473.3     | $19.4 \pm 0.3$ mg/g plat material |
| Total betacyanins          | 4.8                    | 454.2     | $79.2 \pm 0.9$ mg/g plat material |

---

Considering all response variables

|                   |      |     |                               |
|-------------------|------|-----|-------------------------------|
| Extraction yield  |      |     | 1.92 ± 0.05 % (w/w)           |
| Amaranthine       | 13.3 | 500 | 54.1 ± 0.5 mg/g plat material |
| Isoamaranthine    |      |     | 19.0 ± 0.2 mg/g plat material |
| Total betacyanins |      |     | 77.6 ± 0.7 mg/g plat material |

---
